# Supplementary material for: Efficacy and Safety of Fenfluramine for the Treatment of Seizures Associated With Lennox-Gastaut Syndrome: A Randomized Clinical Trial
Source: PubMed Central journal article supplement — JAMA Neurol. 2022 May 2;79(6):554–64. doi: 10.1001/jamaneurol.2022.0829 (PMC9062770; doi:10.1001/jamaneurol.2022.0829), 2022-05-02
Supplement: jamaneurol-e220829-s002.pdf [file jamaneurol-e220829-s002.pdf]

## Supplementary Online Content

Knupp KG, Scheffer IE, Ceulemans B, et al. Efficacy and safety of fenfluramine for the treatment of seizures associated with Lennox-Gastaut syndrome: a randomized clinical trial. *JAMA Neurol*. Published online May 2, 2022. doi:10.1001/jamaneurol.2022.0829

**eFigure 1.** Study Design

**eFigure 2.** Forest Plots: Distribution of Median Percentage Difference From Placebo in Seizure Frequency

**eTable 1.** Titration and Tapering Algorithms

**eTable 2.** Sequential Gatekeeping Procedure to Maintain Type 1 Error Rate at  $\alpha = 0.05$  for Pairwise Comparisons Between Active Treatment and Placebo

This supplementary material has been provided by the authors to give readers additional information about their work.

**eFigure 1. Study Design**

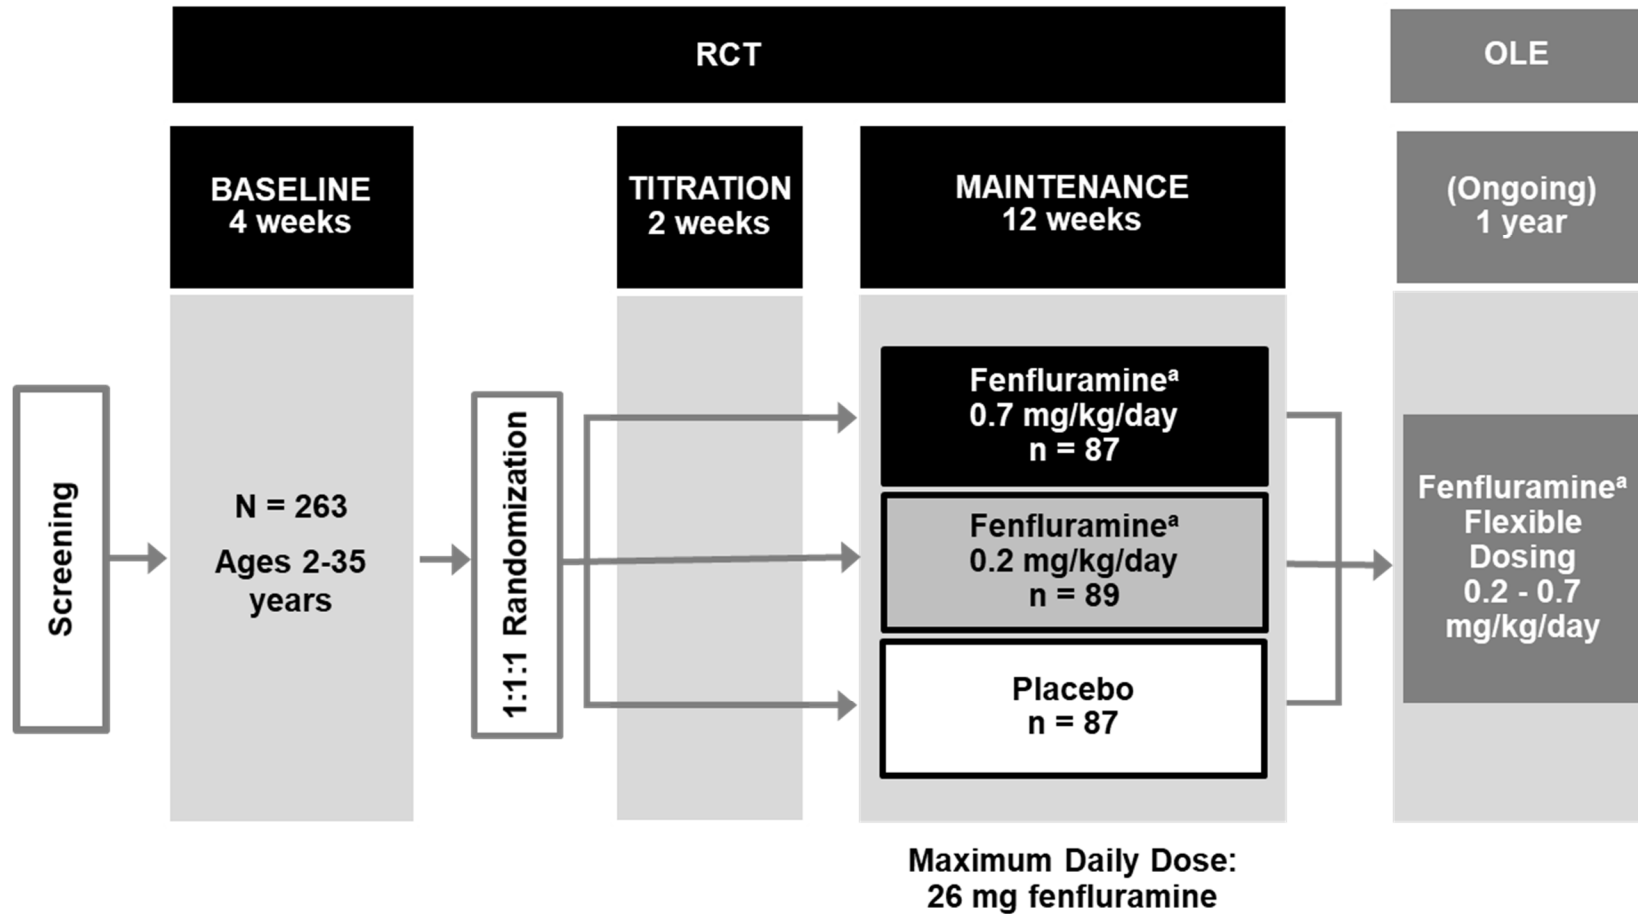

<sup>a</sup>Fenfluramine was administered orally twice daily as an oral solution of fenfluramine hydrochloride containing 2.2 mg/mL fenfluramine. OLE, open-label extension; RCT, randomized clinical trial.

**eFigure 2.** Forest Plots: Distribution of Median Percentage Difference From Placebo in Seizure Frequency

**(A) T+M period. (B) Maintenance only.**

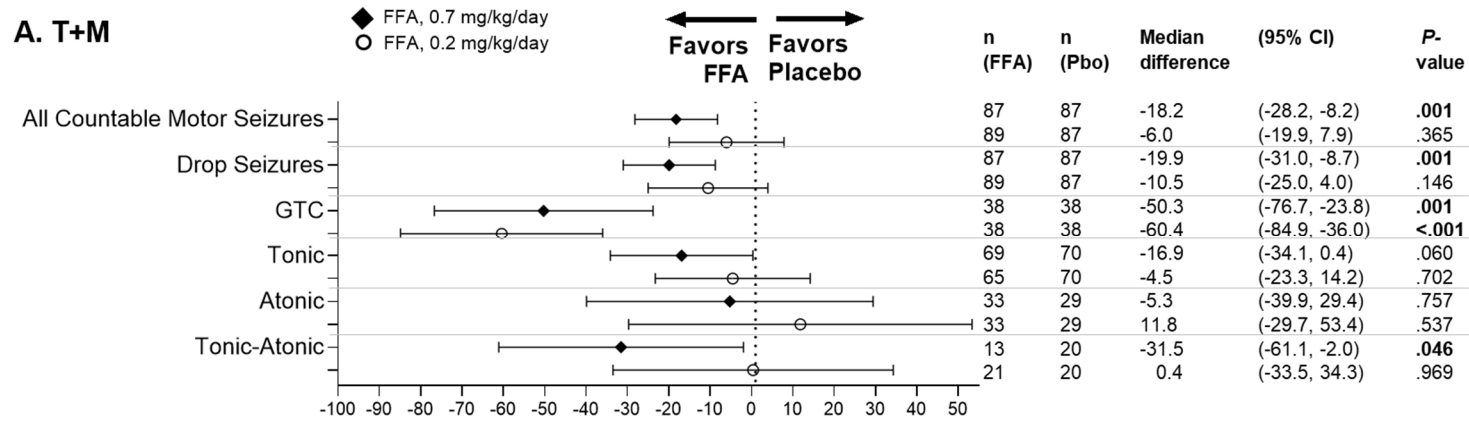

**Median Percentage Difference in Seizure Frequency from Placebo (95% CI)**

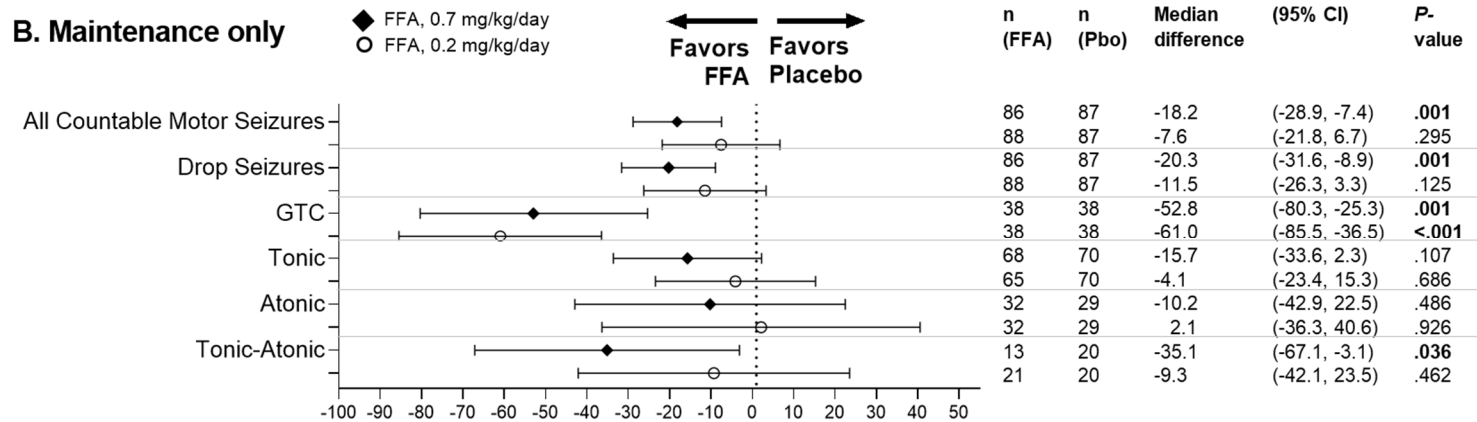

**Median Percentage Difference in Seizure Frequency from Placebo (95% CI)**

Estimated median difference from placebo (Hodges-Lehmann Estimate) in percentage reduction in seizure frequency. The *P*-values are statistically significant for the primary efficacy outcome (drop seizure frequency, 0.7 mg/kg/day FFA); all other *P*-values are considered nominal. CI, confidence interval; FFA, fenfluramine; GTC, generalized tonic-clonic; Pbo, placebo; T+M, combined titration and maintenance periods.

**eTable 1.** Titration and Tapering Algorithms

All patients were titrated to their randomized dose over a 2-week titration period. A tapering protocol was administered to patients who discontinued early or who completed the study but did not continue to the OLE. Patients who transitioned from the double-blind study to the OLE were titrated to a dose of fenfluramine 0.2 mg/kg/day and were then titrated to effect, including those patients who entered the OLE early without completing the double-blind study.

|                                                                            | <b>STEP 1</b>                                               | <b>STEP 2</b>                                               | <b>STEP 3</b>              |
|----------------------------------------------------------------------------|-------------------------------------------------------------|-------------------------------------------------------------|----------------------------|
| <b>Titration<sup>a,b</sup></b>                                             | <b>Study Days 1-4</b>                                       | <b>Study Days 5-8</b>                                       | <b>Study Days 9-14</b>     |
| Placebo                                                                    | Placebo                                                     | Placebo                                                     | Placebo                    |
| Fenfluramine 0.2 mg/kg/day                                                 | Fenfluramine 0.2 mg/kg/day                                  | Fenfluramine 0.2 mg/kg/day                                  | Fenfluramine 0.2 mg/kg/day |
| Fenfluramine 0.7 mg/kg/day                                                 | Fenfluramine 0.2 mg/kg/day                                  | Fenfluramine 0.4 mg/kg/day                                  | Fenfluramine 0.7 mg/kg/day |
| <b>Tapering<sup>a</sup></b>                                                | <b>Days 1-4 after study completion or early termination</b> | <b>Days 5-8 after study completion or early termination</b> |                            |
| Placebo                                                                    | Placebo                                                     | Placebo                                                     |                            |
| Fenfluramine 0.2 mg/kg/day                                                 | Placebo                                                     | Placebo                                                     |                            |
| Fenfluramine 0.7 mg/kg/day                                                 | Fenfluramine 0.4 mg/kg/day                                  | Fenfluramine 0.2 mg/kg/day                                  |                            |
| <b>Transition to OLE from dose group in double-blind study<sup>a</sup></b> | <b>Days 1-4 after Visit 12<sup>c</sup></b>                  | <b>Days 5-14 after Visit 12<sup>c</sup></b>                 |                            |

|                            |                            |                            |
|----------------------------|----------------------------|----------------------------|
| Placebo                    | Fenfluramine 0.2 mg/kg/day | Fenfluramine 0.2 mg/kg/day |
| Fenfluramine 0.2 mg/kg/day | Fenfluramine 0.2 mg/kg/day | Fenfluramine 0.2 mg/kg/day |
| Fenfluramine 0.7 mg/kg/day | Fenfluramine 0.4 mg/kg/day | Fenfluramine 0.2 mg/kg/day |

BID, twice daily; OLE, open-label extension.

<sup>a</sup>Maximum daily dose of fenfluramine, 26 mg.

<sup>b</sup>The dosing regimen, BID for all doses.

<sup>c</sup>Visit 12 is Maintenance Period Study Day 99 (Week 12), or early termination/end of study visit.

**eTable 2.** Sequential Gatekeeping Procedure to Maintain Type 1 Error Rate at  $\alpha = 0.05$  for Pairwise Comparisons Between Active Treatment and Placebo<sup>1</sup>

| Step | Outcome              | Definition                                                                                                                 | Dosage Comparison vs. Placebo |
|------|----------------------|----------------------------------------------------------------------------------------------------------------------------|-------------------------------|
| 1    | Primary              | Change in the frequency of drop seizures between baseline and T+M                                                          | FFA 0.7 mg/kg/day             |
| 2    | Second key secondary | Proportion of subjects who achieve a $\geq 50\%$ reduction from baseline in the frequency of seizures that result in drops | FFA 0.7 mg/kg/day             |
| 3    | Third key secondary  | Clinical Global Impression of Improvement (CGI-I) rating, as assessed by the principal investigator – Any Improvement      | FFA 0.7 mg/kg/day             |
| 4    | Fourth key secondary | Change in frequency of drop seizures between baseline and T+M                                                              | FFA 0.2 mg/kg/day             |
| 5    | Fifth key secondary  | Proportion of subjects who achieve a $\geq 50\%$ reduction from baseline in the frequency of drop seizures                 | FFA 0.2 mg/kg/day             |
| 6    | Sixth key secondary  | Clinical Global Impression of Improvement (CGI-I) rating, as assessed by the principal investigator – Any Improvement      | FFA 0.2 mg/kg/day             |

<sup>1</sup>Primary outcome-defined Epilepsy-Study-Consortium-confirmed seizure subtypes that resulted in a drop were: GTC, secondary GTC, tonic, atonic, and tonic-atonic. If the comparison was statistically significant at the  $\alpha=0.05$  (2-sided) level, hypothesis testing proceeded to the next step; if not, p-values were considered nominal.

CGI-I: Clinical Global Impression—Improvement; GTC, generalized tonic-clonic; T+M, combined titration and maintenance periods.
